# Supplementary material
Source: PubMed Central journal article supplement (PMC3800681)
Supplement: NIHMS492877-supplement-01.pdf [file NIHMS492877-supplement-01.pdf]

**Table S1. Crystallographic Statistics**

|                                                         | <b>Zn Anomalous</b>              | <b>Se Anomalous</b>              |
|---------------------------------------------------------|----------------------------------|----------------------------------|
| <b>Data Collection</b>                                  |                                  |                                  |
| Resolution (Å)                                          | 47.5–2.5 (2.6–2.5)               | 36.7–3.5 (3.6–3.5)               |
| Wavelength (Å)                                          | 1.28180                          | 0.97920                          |
| Space group                                             | P2 <sub>1</sub> 2 <sub>1</sub> 2 | P2 <sub>1</sub> 2 <sub>1</sub> 2 |
| Unit cell dimensions: a, b, c (Å)                       | 46.5, 162.7, 58.4                | 46.5, 162.2, 59.9                |
| Unit cell dimensions: $\alpha$ , $\beta$ , $\gamma$ (°) | 90.0, 90.0, 90.0                 | 90.0, 90.0, 90.0                 |
| Molecules per ASU                                       | 1                                | 1                                |
| No. reflections: total                                  | 198595                           | 76805                            |
| No. reflections: unique                                 | 16035                            | 6188                             |
| Completeness (%)                                        | 99.6 (98.1)                      | 99.4 (97.3)                      |
| Redundancy                                              | 12.4 (10.0)                      | 12.4 (11.0)                      |
| <i>I</i> / $\sigma$ <i>I</i>                            | 18.4 (1.3)                       | 11.8 (1.2)                       |
| CC(1/2) (%)                                             | 100.0 (53.2)                     | 99.9 (67.5)                      |
| Rpim (%)                                                | 2.0 (44.2)                       | 3.9 (53.8)                       |
| No. sites                                               | 1                                | 5                                |
| <b>Refinement</b>                                       |                                  |                                  |
| Resolution (Å)                                          | 47.5–2.5                         |                                  |
| Free reflections (%)                                    | 5                                |                                  |
| R <sub>free</sub> /R-factor                             | 22.5/24.0                        |                                  |
| R.M.S. deviation: bond distances (Å)                    | 0.003                            |                                  |
| R.M.S. deviation: bond angles (°)                       | 0.661                            |                                  |
| <b>Structure/Stereochemistry</b>                        |                                  |                                  |
| No. atoms: nonhydrogen, protein                         | 2980                             |                                  |
| No. atoms: Zn                                           | 1                                |                                  |
| No. atoms: water                                        | 36                               |                                  |
| Ramachandran plot: most favored regions                 | 96%                              |                                  |
| Ramachandran plot: additionally allowed                 | 4%                               |                                  |
| MolProbity score                                        | 2.15                             |                                  |
| Protein Data Bank ID                                    | 4KM5                             |                                  |
